# Supplementary material
Source: PubMed Central journal article supplement (PMC2840097)
Supplement: 0910012107_pnas.200910012SI.pdf [file 0910012107_pnas.200910012SI.pdf]

# Supporting Information

Hu et al. 10.1073/pnas.0910012107

## SI Text

Two induced pluripotent stem cells (iPSC) lines (iPS-108 and -109) were derived from a female adult (retroviral transduced

with OCT4, SOX2, KLF4, and *c-myc*). Both lines were karyotypically normal.

1. Yu J, et al. (2007) Induced pluripotent stem cell lines derived from human somatic cells. *Science* 318:1917–1920.
2. Choi KD, et al. (2009) Hematopoietic and endothelial differentiation of human induced pluripotent stem cells. *Stem Cells* 27:559–567.

3. Yu J, et al. (2009) Human induced pluripotent stem cells free of vector and transgene sequences. *Science* 324:797–801.

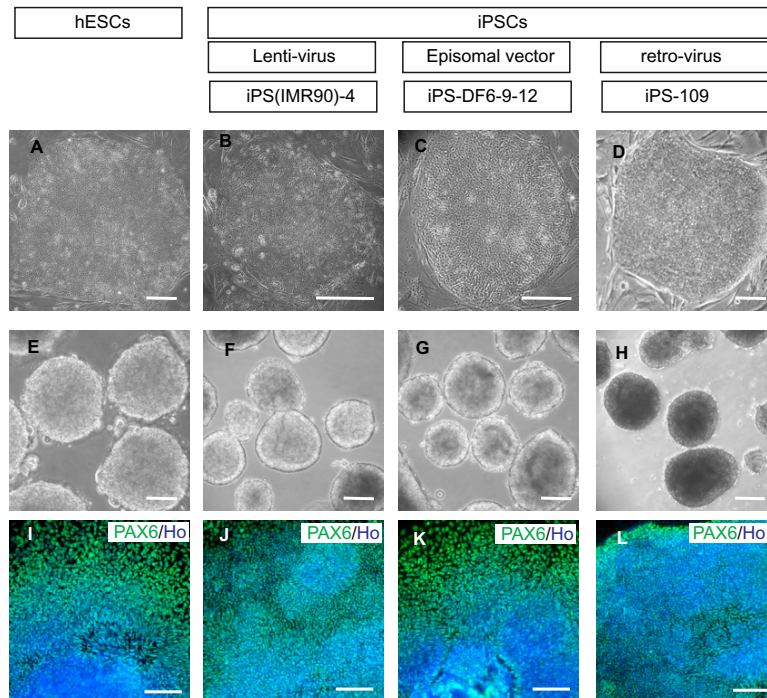

**Fig. S1.** Human iPSCs are indistinguishable from human embryonic stem cells (hESCs) when growing on MEF and forming aggregates. (A–D) Four representative human iPSC lines grow in colonies on mouse embryonic fibroblast (MEF) feeder cells. (E–H) After separation from feeder cells, the human iPSCs form aggregates in suspension culture. (I–L) hESC- and human iPSC-derived neuroepithelial (NE) cells uniformly express PAX6 at day 10. It should be noted that the iPSC colonies that do not have rosettes do not express PAX6. (Scale bar, 100  $\mu$ m.)

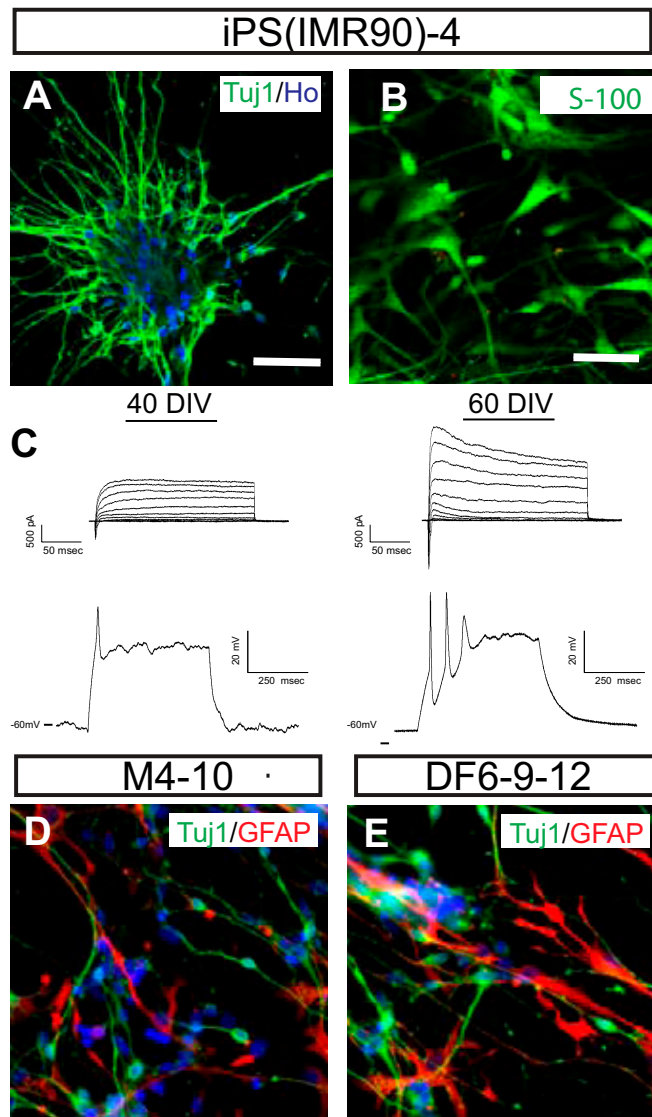

**Fig. S2.** Sequential generation of neurons and glia from human iPSCs. (A and B) Human iPS(IMR90)-4 cell derived Tuj1+ neurons and S100 $\beta$ + astrocyte progenitors are revealed after 6 weeks of differentiation. (C) Representative physiological traces from human iPSC-derived neurons at day 40 revealed relatively small inward currents as well as an inability to fire trains of action potential (APs). At day 60, iPSC-derived neurons displayed larger inward and outward currents as well as the ability to fire trains of APs. (D and E) Human iPSM4-10 and DF6-9-12 derived neurons (Tuj1+) and astrocytes [glial fibrillary acidic protein (GFAP+)] at 3 months of culture. (Scale bar, 50  $\mu$ m.)

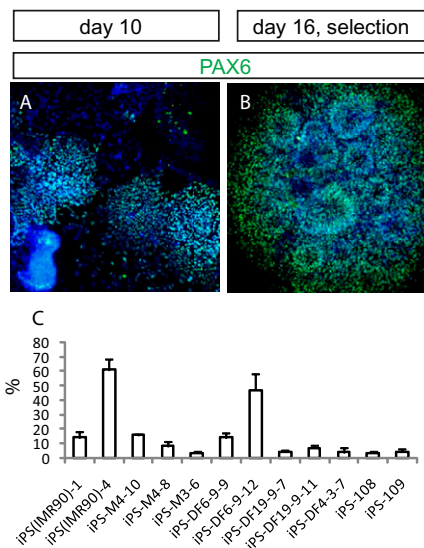

**Fig. S3.** Manual purification of the iPSC-derived NE cells. (A) The heterogeneous culture contained both PAX6+ neuroepithelial cells and PAX6- non-neuroepithelial cells before enrichment. (B) Uniform PAX6+ cells in the form of rosettes after enrichment. (C) Proportion of colonies that possess typical rosettes among total colonies.

**Table S1. Pluripotent stem cell lines**

| iPS lines     | Source line | Sources | Cat#     | Nature          | Age      | Sex | Reprogramming factors                 | Methods          | Terotoma | Reference |
|---------------|-------------|---------|----------|-----------------|----------|-----|---------------------------------------|------------------|----------|-----------|
| iPS(IMR90)-1  | IMR-90      | ATCC    | CCL-188  | Lung fibroblast | 16 weeks | F   | OCT4, SOX2, NANOG, LIN28              | Lentivirus       | Y        | (1)       |
| iPS(IMR90)-4  | IMR-90      | ATCC    | CCL-188  | Lung fibroblast | 16 weeks | F   | OCT4, SOX2, NANOG, LIN28              | Lentivirus       | Y        | (1)       |
| iPS-M4-10     | CCD-1090Sk  | ATCC    | CRL-2106 | Skin fibroblast | 46 years | F   | OCT4, SOX2, NANOG, LIN28              | Lentivirus       | Y        | (2)       |
| iPS-M4-8      | CCD-1090Sk  | ATCC    | CRL-2106 | Skin fibroblast | 46 years | F   | OCT4, SOX2, NANOG, LIN28              | Lentivirus       | Y        | (2)       |
| iPS-M3-6      | CCD-1090Sk  | ATCC    | CRL-2106 | Skin fibroblast | 46 years | F   | OCT4, SOX2, NANOG                     | Lentivirus       | Y        | (2)       |
| iPS-DF6-9-9   | CCD-1079Sk  | ATCC    | CRL-2097 | Skin fibroblast | Newborn  | M   | OCT4, SOX2, NANOG, LIN28, c-Myc, KLF4 | Episomal vectors | Y        | (3)       |
| iPS-DF6-9-12  | CCD-1079Sk  | ATCC    | CRL-2097 | Skin fibroblast | Newborn  | M   | OCT4, SOX2, NANOG, LIN28, c-Myc, KLF4 | Episomal vectors | Y        | (3)       |
| iPS-DF19-9-11 | CCD-1079Sk  | ATCC    | CRL-2097 | Skin fibroblast | Newborn  | M   | OCT4, SOX2, NANOG, LIN28, c-Myc, KLF4 | Episomal vectors | Y        | (3)       |
| iPS-DF19-9-19 | CCD-1079Sk  | ATCC    | CRL-2097 | Skin fibroblast | Newborn  | M   | OCT4, SOX2, NANOG, LIN28, c-Myc, KLF4 | Episomal vectors | Y        | (3)       |
| iPS-DF4-3-7   | CCD-1079Sk  | ATCC    | CRL-2097 | Skin fibroblast | Newborn  | M   | OCT4, SOX2, NANOG, LIN28, c-Myc, KLF4 | Episomal vectors | Y        | (3)       |
| iPS-108       |             | Coriell | GM03814  | Fibroblast      | Adult    | F   | OCT4, SOX2, c-Myc, KLF4               | Retrovirus       | NA       |           |
| iPS-109       |             | Coriell | GM03814  | Fibroblast      | Adult    | F   | OCT4, SOX2, c-Myc, KLF4               | Retrovirus       | NA       |           |

NA, not analyzed.
